# Supplementary material
Source: publisher site journal article supplement (https://www.dovepress.com/article/533780)
Supplement: Supplementary file 1 [file 533780%20Supplementary%20Material.docx]

**Appendix A**

Interview Guide: Health-Promoting Workplaces in Healthcare

This project focuses on organizational initiatives aimed at creating a good organizational and social work environment for doctors, nurses, assistant nurses, and managers in various healthcare settings, such as health centers, hospital clinics, or wards. We investigate the characteristics of these organizational initiatives and the outcomes they can achieve. By "organizational initiatives," we refer to changes, interventions, actions, etc., implemented to improve the work situation and/or organization to achieve a good organizational and social work environment. The nature of these initiatives can vary from one workplace to another. Organizational initiatives aim to improve the employees' work situation rather than targeting individuals with courses or stress management exercises.

Before we start the interview, I want to ensure that you have read the information letter about the project. It explains how we handle personal data and our privacy policy and informs you that you can withdraw your participation at any time without giving a reason. If you have read the information, I would like you to give verbal consent to participate by answering yes or no.

**Background Questions**

- How old are you?
- How long have you worked at this workplace?
- What is your profession/role in the organization?
- Can you briefly describe the organization?
- Can you describe the initiative you have implemented?

**Background of the Initiative**

- What was the deciding factor for implementing the initiative?
- Where did the initiative come from? (e.g., from the manager or a specific professional group)
- What was the goal of the initiative, and what did you want to achieve?

**Implementation of the Initiative**

- How was the initiative implemented? (project leader/project group/additional effort? All at once/gradually?)
- Did you encounter any challenges during the implementation? If so, what were they, and how were they handled?
- Were there any factors that facilitated the implementation? If so, what were they?

**Results of the Initiative**

- Did it turn out as you had planned? (Why or why not?) How was the outcome followed up, and when?
- Did the organizational initiative result in anything unexpected (positive or negative)? If so, what?
- Who in the organization benefited from the initiative? And who did not?
- How do you feel your colleagues in the organization are doing as a result of the initiative?

**Sustaining the Initiative**

- What is the current status? (Has the change persisted, been modified, abolished, etc.?)
- Is the initiative being followed up? What have the follow-ups shown?

**Concluding Questions**

- If you could redo the initiative, what would you do differently?
- If you were to give advice to other organizations in a similar situation, what factors were significant for successfully implementing the initiative? (Can you identify three success factors?)
